# Supplementary material
Source: PubMed Central journal article supplement (PMC4083655)
Supplement: NIHMS370275-supplement-01.pdf [file NIHMS370275-supplement-01.pdf]

## SUPPLEMENTAL FIGURES AND LEGENDS

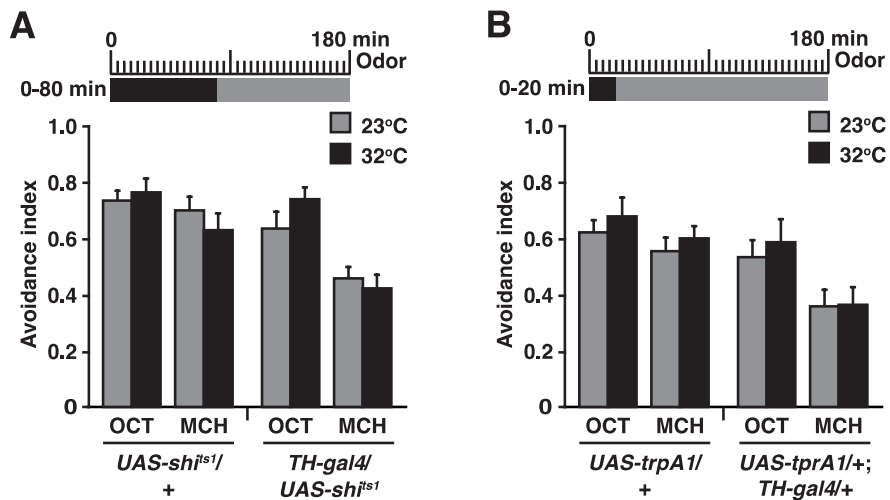

**Figure S1. Olfactory avoidance controls, related to Figure 1**

(A) Avoidance to odors used for conditioning was measured 3 hr after an 80 min treatment at 32°C for all genotypes. There was no significant change in odor avoidance between temperatures within any genotype (OCT,  $P \geq .488$ ; MCH,  $P \geq .819$ ;  $n \geq 8$ ).

(B) There was no significant change in odor avoidance between temperatures within any genotype (OCT,  $P \geq .983$ ; MCH,  $P \geq .988$ ;  $n \geq 8$ ).

**A**

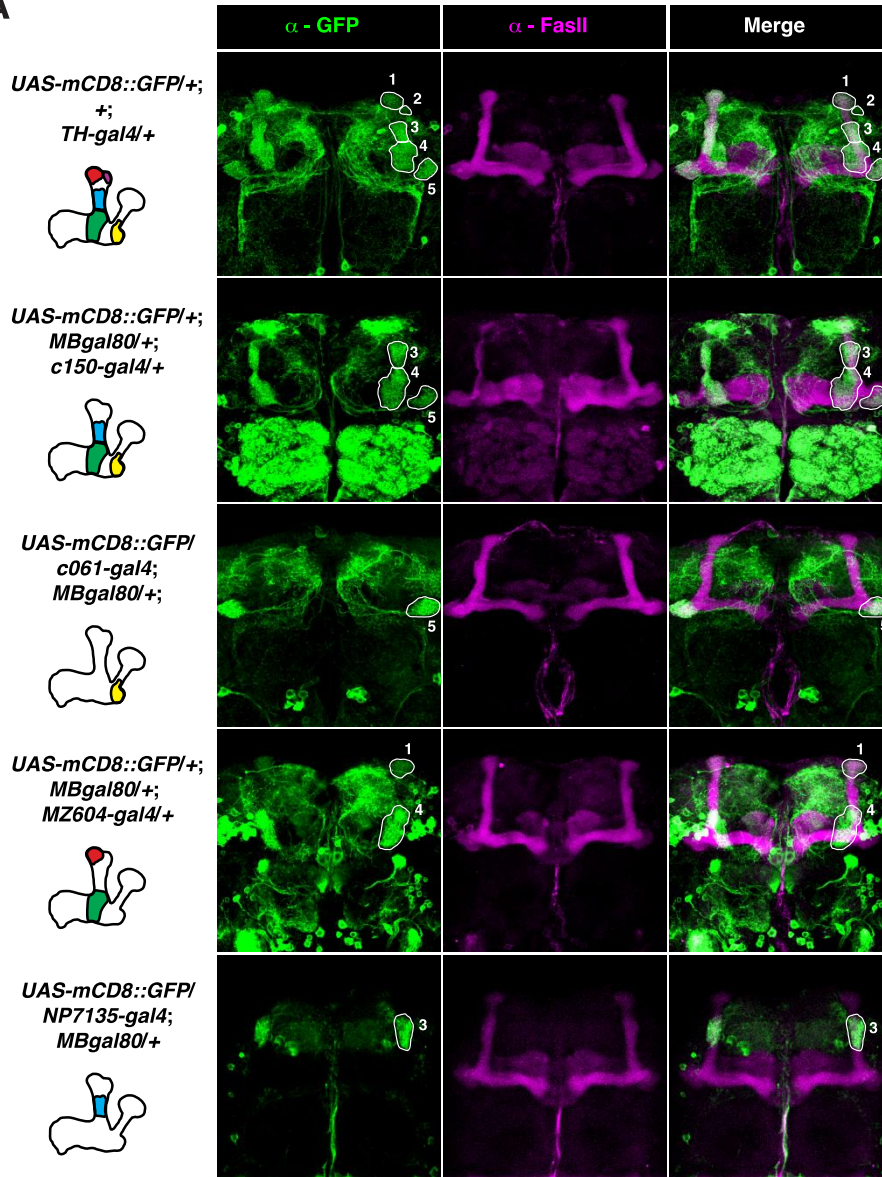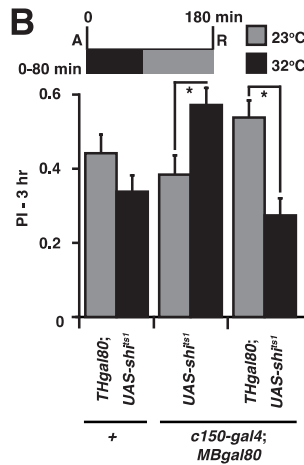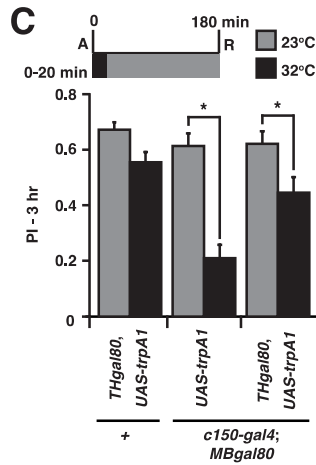

**Figure S2. PPL1 GAL4 driver expression patterns and DAN exclusion experiments, related to Figure 2.**

(A) Brains from each genotype were fixed and stained with primary antibodies to both GFP (green) to visualize PPL1 DANs, and FasII (magenta) to visualize MB neurons. Images represent a maximum projection through the mushroom body lobes. White outlines encircle zones of innervation from the distinct PPL1 DAN classes represented by each *gal4* line. Each zone is numbered 1-5 (1 =  $\alpha$  tip, 2 =  $\alpha'$  tip, 3 = upper stalk, 4 = lower stalk/junction, 5 = heel/peduncle (Mao and Davis, 2009). The *c150-gal4* line also expresses in a few DANs that do not project to the MBs as revealed by anti-TH staining (data not shown).

(B) 3 hr PI after an 80 min heat exposure was compared between animals carrying *c150-gal4*, *MBgal80*, and *UAS-shi<sup>ts1</sup>* with or without *THgal80*. There was a significant increase in PI associated with high temperature for *MBgal80/+*; *c150-gal4/UAS-shi<sup>ts1</sup>*, but a significant decrease in PI for *MBgal80/THgal80*; *c150-gal4/UAS-shi<sup>ts1</sup>* (\*,  $P \leq .05$ ,  $n \geq 10$ ).

(C) 3 hr PI after a 20 min heat exposure compared for animals carrying *c150-gal4*, *MBgal80*, and *UAS-trpA1* with or without *THgal80*. Performance was significantly decreased in both *MBgal80/UAS-trpA1*; *c150-gal4/+* flies and in *MBgal80/THgal80,UAS-trpA1*; *c150-gal4/+* flies for within genotype comparisons. In comparisons across genotypes at 32°C, *MBgal80/UAS-trpA1*; *c150-gal4/+* flies exhibited significantly lower performance than *MBgal80/THgal80,UAS-trpA1*; *c150-gal4/+* or *THgal80,UAS-trpA1/+* flies (\*,  $P \leq .05$ ,  $n \geq 8$ ).
